# Supplementary material for: Unraveling the potential of pesticide-tolerant Pseudomonas sp. augmenting biological and physiological attributes of Vigna radiata (L.) under pesticide stress
Source: Royal Society of Chemistry journal article supplement (doi:10.1039/d2ra01570f), 2022-01-01
Supplement: d2ra01570f1.pdf [file d2ra01570f1.pdf]

1 **Electronic Supporting Information**

2 **Unraveling the potential of pesticide-tolerant *Pseudomonas* sp. augmenting**  
3 **biological and physiological attributes of *Vigna radiata* (L.) under pesticide**  
4 **stress**  
5

6 <sup>1</sup>Nouf M. Al-Enazi, <sup>2</sup>Mona S. AlTami, <sup>3</sup>Eman Alhomaidi\*

7 <sup>1</sup>Department of Biology, College of Science and Humanities, Al-Kharj, Prince Sattam Bin  
8 Abdulaziz University, Al-Kharj, 11492, Saudi Arabia

9  
10 <sup>2</sup>Biology Department, College of Science, Qassim University, Burydah, Saudi Arabia

11  
12 <sup>3</sup>Department of Biology, College of Science, Princess Nourah bint Abdulrahman University,  
13 P.O. Box 84428, Riyadh, 11671, Saudi Arabia  
14

15  
16  
17 Correspondence to:

18 Eman Alhomaidi

19 Department of Biology, College of Science,  
20 Princess Nourah bint Abdulrahman University,  
21 P.O. Box 84428, Riyadh, 11671, Saudi Arabia  
22

23 Email: [eaalhomaid@pnu.edu.sa](mailto:eaalhomaid@pnu.edu.sa)  
24  
25  
26  
27  
28  
29  
30  
31  
32  
33  
34  
35

## Supplementary Methods

1  
2  
3  
4  
5  
6  
7  
8  
9  
10  
11  
12  
13  
14  
15  
16  
17  
18  
19  
20  
21  
22  
23  
24  
25  
26  
27  
28  
29  
30  
31

### ***Assessment of pesticide-induced morphological changes in bacterial strain using scanning electron microscopy (SEM)***

Pesticide induced cellular damage/distortion in molecularly characterized bacterial strains was observed under SEM (JSM 6510 LV, JEOL, Japan) by growing bacterial strains in NB medium treated with fungicides: kitazin ( $2400 \mu\text{g mL}^{-1}$ ), hexaconazole ( $1500 \mu\text{g mL}^{-1}$ ) and metalaxyl at  $28 \pm 2^\circ\text{C}$  for 24 h. The culture grown in pesticide free medium served as control. After incubation, cultures were centrifuged at 12,000 rpm for 10 min. and pellet was suspended in  $1 \times$  PBS and the cell pellets were washed again three times with  $1 \times$  PBS and pre-fixed ( $4^\circ\text{C}$ ) with 2.5% glutaraldehyde for overnight. The cells were recovered by centrifugation at 10000 rpm for 5 min. and pellet was again washed with same buffer. After three successive washing, the fixed specimens were dehydrated in a graded series (30, 50, 70, 90 and 100%) of ethanol for 5 min. each. After this, cell pellets were centrifuged and re-suspended in PBS. Five millilitres of bacterial suspensions were smeared on cover slip and dried. The specimens were mounted and analyzed under the SEM to record changes in bacterial structures, if any, and images were recorded.

### ***Determination cellular permeability of Pseudomonas sp. strain PGR-11 under CLSM***

Alterations in the membrane integrity and bacterial mortality were assessed by fluorescence microscopy as previously used by Shahid and Khan (2018). For this, bacterial strains were grown in NB medium treated with different rates of each pesticide and incubated. To the  $200 \mu\text{L}$  of pesticide treated and untreated (control) bacterial suspensions,  $10 \mu\text{L}$  of acridine orange (AO:  $15 \mu\text{g mL}^{-1}$  prepared in PBS) and  $10 \mu\text{L}$  of propidium iodide (PI:  $50 \mu\text{g mL}^{-1}$  prepared in PBS) were added. Bacterial suspensions stained both with AO and PI dyes was incubated at room temperature for 10 min. and centrifuged (at 5000 rpm) for 10 min. The supernatants were discarded to remove the unbound dyes while cell pellet was resuspended in  $500 \mu\text{L}$  of PBS. The experimental setup was maintained in the dark conditions to avoid photobleaching of dyes. Images were recorded in CLSM (LSM-780, Confocal microscope, Zeiss, Germany). The samples were then observed for PI stained dead cells with an excitation/emission maxima of 493/636 nm for PI.

1 ***Inoculation impact of PGR-11 strain on photosynthetic pigments in V. radiata***

2 Photosynthetic pigments (Chl a, Chl b, total chlorophyll and carotenoid content) in fresh foliage  
3 of was measured according to the method of Arnon (1949). The pigments were extracted from  
4 fresh leaves by macerating in 80% acetone. Absorption of chlorophyll and carotenoid content in  
5 the extract was determined using UV visible spectrophotometer (UV-2450, Shimadzu, Tokyo,  
6 Japan). The total photosynthetic pigments (Chl a, Chl b and total chlorophyll) was calculated as:

7 
$$\text{mg chl. a/g tissue} = 12.7 (A_{663}) - 2.69 (A_{645}) \times V/1000 \times W$$

8 
$$\text{mg chl. b/g tissue} = 22.9 (A_{645}) - 4.68 (A_{663}) \times V/1000 \times W$$

9  
10 
$$\text{mg total chl./g tissue} = 20.2 (A_{645}) + 8.02 (A_{663}) \times V/1000 \times W$$

11 Carotenoid content was determined by the formula as suggested by Krik and Allen (1965):

12 
$$\text{Carotenoids (mg/g tissue)} = (A_{480}) + 0.114 (A_{663}) - 0.638 (A_{645})$$

13 Where,  $A_{\lambda}$  = absorbance at specific wavelength  $\lambda$  (nm); V= final volume of chlorophyll  
14 extracted in 80% acetone, and W= fresh weight of tissue extract.

15 ***Leaf Exchange parameters***

16 The gas exchange parameters of strain PGR-11 inoculated and pesticide-treated foliage were  
17 also evaluated. Stomatal conductance ( $g_s$ ), rate of transpiration, internal  $\text{CO}_2$  concentration ( $C_i$ ),  
18 net photosynthetic rate (PN), and vapor pressure deficit (kPa) were measured using a Li-COR  
19 6400 portable photosynthesis system (Li-COR, Lincoln, NE, USA). Net photosynthetic rate  
20 ( $A_N$ ), stomatal conductance ( $g_s$ ), and intercellular  $\text{CO}_2$  concentration ( $C_i$ ) were all determined at  
21 ambient  $\text{CO}_2$  concentration, temperature of 25–28 °C, 50±5 % relative humidity, and a  
22 photosynthetic photon flux density (PPFD) of 1000  $\mu\text{mol m}^{-2} \text{s}^{-1}$  to record each measurement.  
23 Photosynthetic area was approximated as half the area of the cylindrical branches, as only the  
24 upper half received the unilateral illumination in the leaf chamber.

25 ***Seed Attributes***

26 For protein estimation, 500 mg of seeds were soaked in phosphate buffer (pH =7.4) and  
27 extracted in 3 mL of 50 mM phosphate buffer (pH =7.8) containing 1mM EDTA and 2% w/v  
28 polyvinylpyrrolidone (PVP). The extract was spun at 5742 g for 10 min. at 4°C and supernatant  
29 was used for protein analysis. A- 0.2 mL aliquot was taken from the sample extract and the  
30 volume was made up to 1.0 mL. To it, 4.5 mL of copper solution was added and was allowed to  
31 stand for 10 min. Then, 0.5 mL of Folin's reagent was added to each tube and incubated for 30  
32 min. for colour development. Absorbance of blue colour was read at 660 nm on a UV-Vis

1 spectrophotometer. The protein concentration in the supernatant was determined using a  
2 calibration curve of BSA as a standard (Lowry et al., 1951).

3

4

5

6

7

8

9

10

11

12

13

14

15

16

17

18

19

20

21

22

23

24

25

26

27

28

29

30

1

## Supplementary Tables

2 **Table S1:** Details of Fungicides used the in present study

| Characteristics    | Fungicide used                                                                      |                                                                                     |                                                                                      |
|--------------------|-------------------------------------------------------------------------------------|-------------------------------------------------------------------------------------|--------------------------------------------------------------------------------------|
|                    | Tebuconazole (TBZL)                                                                 | Metalaxyl (MTXL)                                                                    | Carbendazim (CBZM)                                                                   |
| Common name        | Tebuconazole                                                                        | Metalaxyl                                                                           | Carbendazim                                                                          |
| Chemical name      | (RS)- 1-(4-Chlorophenyl)- 4,4-dimethyl-3-(1H, 1,2,4-triazol-1-ylmethyl)pentan- 3-ol | methyl N-(methoxyacetyl)-N-(2,6-xylyl)-DL-alaninate                                 | methyl benzimidazol-2-ylcarbamate                                                    |
| Chemical family    | Triazole                                                                            | Anilide                                                                             | Benzimidazole                                                                        |
| Grade              | Commercial (48% EC)                                                                 | Commercial (35% w/w)                                                                | Commercial (50% w/w)                                                                 |
| Trade name         | Folicur                                                                             | Ridomil, Subdue, Apron,                                                             | Bendaco                                                                              |
| Appearance         | transparent liquid                                                                  | Fine white powder                                                                   | White, crystalline solid                                                             |
| Molecular weight   | 307.82 g/mol                                                                        | 279.33 g/mol                                                                        | 191.187 g/mol                                                                        |
| Empirical formula  | C <sub>16</sub> H <sub>22</sub> ClN <sub>3</sub> O                                  | C <sub>15</sub> H <sub>21</sub> NO <sub>4</sub>                                     | C <sub>9</sub> H <sub>9</sub> N <sub>3</sub> O <sub>2</sub>                          |
| Solubility         | Water/DMSO                                                                          | Water/DMSO                                                                          | Water/DMSO                                                                           |
| Chemical structure | 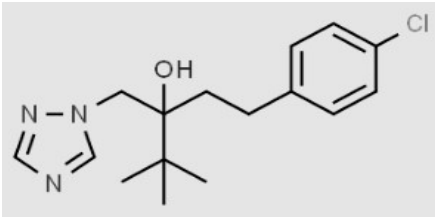  |  |  |

3

4

5

6

7

8

9

10

11

12

13

14

1 **Table S2. The chlorophyll fluorescence parameters used in this study**

| <b>Parameters</b> | <b>formula</b>          | <b>Description</b>                                                              |
|-------------------|-------------------------|---------------------------------------------------------------------------------|
| Fv/Fm             | $(F_m - F_0)/F_m$       | Maximum quantum yield of PSII photochemistry measured in the dark-adapted state |
| Y(PSII)           | $(F_{0m} - F_s)/F_{0m}$ | Effective quantum yield of photochemical energy conversion in PSII              |
|                   |                         |                                                                                 |

2

3

4

5

6

7

8

9

10

1 **Table S3:** Screening of PGPR strain for plant growth promoting attributes

| PGPR strains | Indole-3-acetic acid production ( $\mu\text{g/mL}$ ) |      |      |      |      | ACC deaminase ( $\mu\text{M } \alpha\text{-ketobutyrate mg}^{-1} \text{ protein h}^{-1}$ ) | Siderophore | $\text{NH}_3$ | HCN |
|--------------|------------------------------------------------------|------|------|------|------|--------------------------------------------------------------------------------------------|-------------|---------------|-----|
|              | 0*                                                   | 50*  | 100* | 200* | 400* |                                                                                            |             |               |     |
| PGR-1        | 12.4                                                 | 19.3 | 23.4 | 26.7 | 43.2 | 11.2                                                                                       | ++          | ++            | +   |
| PGR-2        | 7.8                                                  | 14.3 | 26.7 | 35.8 | 52.4 | 9.3                                                                                        | +           | +             | +   |
| PGR-3        | 6.9                                                  | 12.4 | 18.6 | 28.9 | 43.8 | 15.7                                                                                       | +           | +             | +   |
| PGR-4        | 11.4                                                 | 18.9 | 25.7 | 33.1 | 47.8 | 23.6                                                                                       | ++          | +             | +   |
| PGR-5        | 14.5                                                 | 22.5 | 29.6 | 39.0 | 52.3 | 12.6                                                                                       | ++          | +             | +   |
| PGR-6        | 8.6                                                  | 11.7 | 22.5 | 32.1 | 45.0 | 16.7                                                                                       | +           | +             | +   |
| PGR-7        | 7.4                                                  | 13.2 | 20.6 | 30.2 | 38.9 | 15.3                                                                                       | +           | +             | -   |
| PGR-8        | 13.2                                                 | 18.9 | 34.6 | 38.6 | 48.1 | 18.9                                                                                       | +           | ++            | -   |
| PGR-9        | 18.9                                                 | 23.4 | 32.1 | 40.2 | 54.0 | 24.7                                                                                       | +           | ++            | +   |
| PGR-10       | 9.4                                                  | 16.9 | 28.9 | 37.9 | 49.3 | 19.3                                                                                       | +           | ++            | +   |
| PGR-11       | 22.1                                                 | 32.4 | 43.6 | 57.8 | 82.9 | 34.6                                                                                       | +++         | ++            | +   |
| PGR-12       | 12.0                                                 | 20.0 | 28.0 | 34.0 | 54.6 | 23.0                                                                                       | +           | ++            | -   |
| PGR-13       | 17.2                                                 | 26.8 | 38.7 | 48.9 | 58.3 | 12.0                                                                                       | ++          | +             | -   |
| PGR-14       | 8.6                                                  | 17.0 | 27.0 | 37.9 | 51.0 | 9.4                                                                                        | ++          | +             | +   |
| PGR-15       | 7.0                                                  | 15.0 | 23.4 | 33.1 | 48.3 | 18.0                                                                                       | ++          | +             | -   |

2 Each value is the mean of three replicates ( $n = 3$ ). ACC = 1-amino cyclopropane 1-carboxylate deaminase,  $\text{NH}_3$  = ammonia and HCN  
3 = hydrogen cyanide.

4

5

6

7

1

**Table S4: Pesticides tolerance**

| PGPR strains | Pesticide tolerance ( $\mu\text{g mL}^{-1}$ ) |           |              |
|--------------|-----------------------------------------------|-----------|--------------|
|              | Carbendazim                                   | Metalaxyl | Tebuconazole |
| PGR-1        | 400                                           | 800       | 400          |
| PGR-2        | 400                                           | 400       | 400          |
| PGR-3        | 200                                           | 400       | 200          |
| PGR-4        | 100                                           | 200       | 100          |
| PGR-5        | 50                                            | 200       | 50           |
| PGR-6        | 200                                           | 800       | 800          |
| PGR-7        | 400                                           | 1200      | 800          |
| PGR-8        | 200                                           | 200       | 800          |
| PGR-9        | 10                                            | 400       | 1200         |
| PGR-10       | 50                                            | 100       | 1200         |
| PGR-11       | 800                                           | 1200      | 1600         |
| PGR-12       | 200                                           | 200       | 1200         |
| PGR-13       | 400                                           | 1000      | 800          |
| PGR-14       | 200                                           | 200       | 800          |
| PGR-15       | 200                                           | 400       | 400          |

2 Each value is the mean of three replicates ( $n = 3$ ).

3

4

5

6

7

8

9

10

11

12

13

14

15

16

17

18



**Table S5:** Morphological and biochemical characterization of *Pseudomonas* sp. PGR-11

| <b>Characteristics</b>          | <b><i>Pseudomonas</i> sp. PGR-11</b>  |
|---------------------------------|---------------------------------------|
| <i>Morphology</i>               |                                       |
| Gram reaction                   | Negative rod                          |
| Colony character                | Round, creamish, opaque, yellow-green |
| <i>Biochemical reactions</i>    |                                       |
| Citrate utilization             | positive                              |
| Indole                          | negative                              |
| Methyl red                      | positive                              |
| Nitrate reduction               | positive                              |
| Oxidase                         | positive                              |
| Voges-Proskauer                 | negative                              |
| Catalase                        | positive                              |
| <i>Carbohydrate utilization</i> |                                       |
| Dextrose                        | positive                              |
| Lactose                         | positive                              |
| Mannitol                        | positive                              |
| Sucrose                         | positive                              |
| <i>Hydrolysis</i>               |                                       |
| Starch                          | positive                              |
| Gelatin                         | positive                              |
| <i>Tolerance to</i>             |                                       |
| CBZM                            | 800 µg mL <sup>-1</sup>               |
| TBZL                            | 1600 µg mL <sup>-1</sup>              |
| MTXL                            | 1200 µg mL <sup>-1</sup>              |

## Supplementary Figures

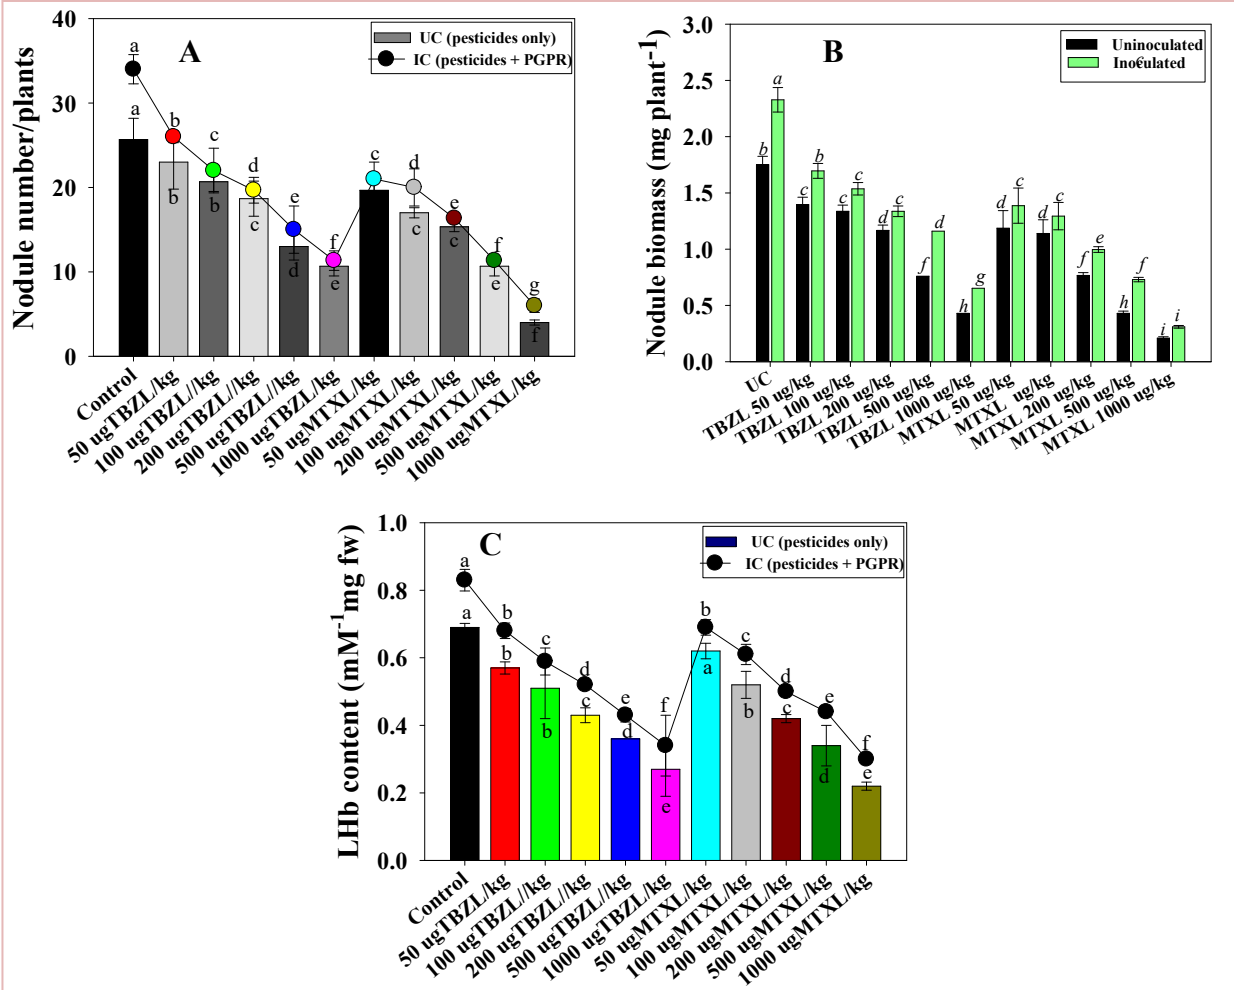

2

3 **Figure S1:** Impact of *Pseudomonas* sp. strain PGR-11 on nodule number (A) nodule biomass  
 4 (B) and LHb content extracted from root nodules detached from *V. radiata* raised in soil treated  
 5 with increasing concentrations of TBZL and MTXL. Each value is a mean of three independent  
 6 replicates. Bar and line diagrams represent the mean values of three replicates ( $n = 3$ ) of three  
 7 plants/pot. Mean values followed by different letters are significantly different ( $p \leq 0.05$ ) as  
 8 determined by the DMRT test. Vertical and scattered bars represent means  $\pm$  SDs ( $n = 3$ ). Here,  
 9 TBZL = tebuconazole and MTXL= metalaxyl.
